1 Detection of protein markers for autophagy, autolysis and apoptosis processes in a  
2 *Saccharomyces cerevisiae* wine flor yeast strain when forming biofilm

3

4 Jaime Moreno-Garcia<sup>a</sup>, Juan Carlos Mauricio<sup>a#</sup>, Juan Moreno<sup>b</sup> and Teresa Garcia-  
5 Martinez<sup>a</sup>

6

7 <sup>a</sup>Department of Microbiology, Agrifood Campus of International Excellence ceiA3,  
8 University of Cordoba, Cordoba, Spain.

9 <sup>b</sup>Department of Agricultural Chemistry, Agrifood Campus of International Excellence  
10 ceiA3, University of Cordoba, Cordoba, Spain.

11

12 Running title: Autophagy/autolysis/apoptosis proteins in flor biofilm

13

14 #Address correspondence to Juan Carlos Mauricio, [mi1gamaj@uco.es](mailto:mi1gamaj@uco.es).

15 \*Present address: Jaime Moreno-García, Department of Chemistry, Umeå University,  
16 SE-901 87 Umeå, Sweden.

17

18

19

20

21

## 22 **Abstract**

23 Yeast autophagy, autolysis and apoptosis are triggered by nutrient starvation  
24 conditions that usually take place in winemaking. Biological aging of Sherry wines  
25 constitutes an enological environment suitable for the induction of these biological  
26 processes due to the scarcity of nutrients and formation of yeast social communities, i.e.  
27 biofilm; however, few studies have been carried out in this regard. Here, we perform a  
28 proteomic analysis to detect any autolysis/autophagy/apoptosis protein markers and/or  
29 proteins potentially related to these processes under flor forming and fermentative  
30 conditions. The scarce presence of autophagy proteins in flor biofilm forming  
31 conditions, the existence of autophagy inhibitors (e.g. Pph21p), and high quantity of  
32 crucial proteins for autolysis and apoptosis, Pep4p and Mca1p, respectively; indicate  
33 that autophagy may be silenced while autolysis and apoptosis are activated when the  
34 yeasts are forming flor. This is the first time that autophagy, autolysis and apoptosis  
35 have been studied as a whole in flor yeast to our knowledge.

## 36 **Importance**

37 Flor yeasts are *Saccharomyces cerevisiae* strains traditionally used in  
38 winemaking and have the ability to survive under starvation conditions and form  
39 biofilm. These capabilities make flor yeast interesting organisms to study the biological  
40 processes of autophagy, autolysis and apoptosis. With this work, we aim to seek for  
41 evidences —protein markers— of these processes in a flor yeast when subjected to  
42 biofilm forming and fermentative conditions. Our results suggest that while autophagy  
43 may be silenced under biofilm conditions, autolysis and apoptosis are activated. The  
44 data provided improve the knowledge of yeast behavior under different enological  
45 conditions and can further improve quality of wines in a near future.

46           **Keywords**

47           Flor yeast, biofilm, autophagy, autolysis, apoptosis, protein markers

48           **Introduction**

49           Yeast autolysis has been a subject of study for decades and its positive influence  
50           on the organoleptic profile of some types of wines is widely recognized (reviewed in  
51           [1]), while biological processes of autophagy and apoptosis are less known in yeasts  
52           (reviewed in [2-5]). These three processes —autophagy, autolysis and apoptosis— are  
53           associated with each other and are all triggered by starvation for nutrients (among other  
54           stress conditions) [6-9], which usually happen in enological environments. Autolysis,  
55           for instance, takes place during ageing of sparkling wines produced by the traditional  
56           méthode champenoise in which yeasts are subjected to low contents of nitrogen and  
57           carbon conditions [10-14]. Autophagy was reported as well during sparkling wine aging  
58           by the occurrence of morphological changes and the presence of autophagic bodies [15].  
59           Piggot et al. (2011) [16] also showed that autophagy takes place in still wine  
60           fermentation. More recently, Orozco et al. (2013) [17] found that factors relating to  
61           apoptosis, such as caspase Mca1p or apoptosis-inducing factor Aif1p play a positive  
62           role in yeast longevity during winemaking in times of dwindling resources during  
63           chronological aging.

64           Other environments common in winemaking in which these processes may  
65           occur are flocs and biofilms. The benefit of a cellular suicide program in social  
66           communities seems evident because self-destruction of damaged and old cells, which  
67           consume dwindling nutrients, contributes to the viability/reproductive success of  
68           healthier members of the community. In the case of Sherry wine, special *S. cerevisiae*  
69           strains, known as flor yeasts, have to deal with lack of fermentable carbon sources

70 (among other stresses) and form an air-liquid biofilm formation, so-called flor, in  
71 biological aging conditions that occur after fermentation [18, 19]. In this work, we  
72 attempt to approach the three biological processes —autophagy, autolysis and  
73 apoptosis— in a flor biofilm environment. Hitherto, only autolysis has been evidenced  
74 under biological aging conditions [20] while autophagy and apoptosis have remained  
75 unreported. Nonetheless, in a previous study, our group accounted the presence of  
76 apoptosis factors when studying the mitochondrial proteome in a flor yeast when  
77 forming flor [21].

78       Following other authors' experiments in which proteins are used as markers [22,  
79 23], we performed a targeted proteomic analysis to detect any  
80 autophagy/autolysis/apoptosis markers and/or related proteins, in a flor yeast strain  
81 under a biofilm forming condition (lacking glucose and high in ethanol) and under a  
82 fermentative condition (high glucose). This study is part of a sequence of un-  
83 targeted/targeted proteomic researches of flor yeasts [21, 24-27], which distinctively  
84 analyze the autolysis/autophagy/apoptosis proteome under biofilm forming and  
85 fermentative conditions.

## 86 **Material and methods**

### 87 *Microorganism and cultivation conditions*

88       *S. cerevisiae* G1 (ATCC: MYA-2451), a wild type of an industrial wine flor  
89 yeast strain, capable of fermenting and aging wine, from the Department of  
90 Microbiology (University of Cordoba, Spain) collection was used in this work. G1  
91 under biological aging conditions, produces a thick flor velum about 30 days after  
92 inoculation with a cellular viability higher than 90% and a small proportion of sediment  
93 cells in the bottom of flasks [28].

94 A medium mimicking a biological aging condition, in this case a biofilm  
95 forming condition (BFC), was prepared without sugars consisting of 0.67% w/v YNB  
96 w/o amino acids, 10 mM glutamic acid, 1% w/v glycerol and 10% v/v ethanol,  
97 incubated at 21 °C without shaking for 29 days. Fermentative condition (FC) was  
98 developed in a medium containing 0.67% w/v YNB without amino acids, 10 mM  
99 glutamic acid, and 17% w/v glucose, and yeasts were incubated at 21 °C under gentle  
100 shaking for 12 h or until the middle of the log phase.  $1 \times 10^6$  cells/mL were inoculated in  
101 each medium. All experiments were carried out by triplicate in flasks closed with  
102 hydrophobic cotton.

### 103 *Proteome analysis*

104 Sampling times were chosen to obtain the maximum number of proteins in  
105 viable cells [28-31]. These were at the middle of the log phase, different for each  
106 condition: 12 hours from inoculation for FC and 29 days for BFC. At day 29th G1 flor  
107 yeast cells are in the initial phase of velum formation (Ph I) and the biofilm is  
108 completely formed in the air-liquid interface [32].

109 Methods for harvesting the cells and protein extraction are indicated in [21, 24].  
110 Yeast proteins under both conditions were extracted and later subjected to fractionation  
111 through 3100 OFFGEL (Agilent Technologies, Palo Alto, CA) followed by an  
112 identification by LTQ Orbitrap XL mass spectrometer (Thermo Fisher Scientific, San  
113 Jose, CA, USA) equipped with a nano LC Ultimate 3000 system (Dionex, Germany)  
114 (see [21-25] for more details). After identification, protein were quantified in terms of  
115 the exponentially modified protein abundance index (emPAI; [33]).

116 Proteins related to autophagy, autolysis and apoptosis were selected by using  
117 SGD (<http://www.yeastgenome.org/>), Uniprot and references. These proteins together

118 with the identification and quantification values are shown in Supplemental material 1.  
119 This file shows information about each autophagy, autolysis and apoptosis related  
120 protein detected in this analysis including a brief description, biological process and  
121 molecular function, the molar weight (Mr), a score value (combination of the XCorr  
122 values for its constituent peptides), observable and observed peptides and relative  
123 content as calculated from its PAI value. Protein content averages in mol% considering  
124 all proteins detected in each sample, were 0.24 at BFC and 0.16 at FC.

125 Information about proteins annotated in the autophagy, autolysis and apoptosis  
126 processes, considering the whole proteome of *S. cerevisiae* [34] and their content  
127 according to Ghaemmaghami et al. (2003) [29], were used as reference material (Table  
128 1). Further, the SGD tool “GO Term finder” was used to determine the FDR (False  
129 Discovery Rate) and  $p$ -value for each protein group annotation considering all  
130 autophagy, autolysis and the apoptosis proteins in each sample (Supplemental material  
131 2).  $p$ -value is defined as the probability or chance of seeing at least “ $x$ ” number of genes  
132 (in our case ORFs) out of the total “ $n$ ” genes in the list annotated to a particular GO  
133 (Gene Ontology) term, given the proportion of genes in the whole genome that are  
134 annotated to that GO Term. GO Terms with  $p$ -values lower than 0.1 have been  
135 highlighted (Supplemental material 2). The  $p$ -value is calculated using the  
136 Hypergeometric distribution. Four numbers are used to calculate each  $p$ -value:  $n$ , the  
137 number of objects in the sample;  $N$ , the number of objects in the reference population  
138 (6604 proteins from the *S. cerevisiae* whole proteome),  $k$ , the number of objects  
139 annotated with this item in the sample; and  $M$ , the number of objects annotated with  
140 item in the reference population:

141

$$p = \frac{\binom{M}{k} \binom{N-M}{n-k}}{\binom{N}{n}}$$

## 142 **Results**

143 Proteins involved in the autophagy, autolysis and apoptosis processes were  
144 identified in both BFC and FC samples. In both conditions, the frequency of proteins  
145 involved in these processes were high ( $> S. cerevisiae$  proteome frequency values, see  
146 Table 1). Apoptosis protein frequencies overpassed *S. cerevisiae* proteome frequency by  
147 4 and 2-fold under BFC and FC, respectively. Autophagy proteins were more frequent  
148 and abundant under FC (considering the sum of content of all autophagy proteins under  
149 the conditions) (Table 1). The total protein content in BFC was half of the *S. cerevisiae*  
150 autophagy proteome content reported by Ghaemmaghami et al. (2003) [29] at log phase  
151 under rich-medium conditions pointing out a down-regulation during biological aging.  
152 The opposite happens for the autolysis and apoptosis proteomes in which BFC  
153 proteome was higher in frequency and abundance: 2.91 at BFC vs. 1.96% at FC and  
154 4.20 at BFC vs. 1.66 mol% at FC for the autolysis proteome, while 2.42% at BFC vs.  
155 1.31% at FC and 2.96 at BFC vs. 1.98 mol% at FC for the apoptosis proteome.

156 To achieve a detailed conclusion, each process has been treated separately from  
157 now on.

### 158 *1. Autophagy*

159 6 and 11 proteins out of the 95 autophagy proteins in *S. cerevisiae* were reported  
160 under BFC and FC, respectively. From the SGD GO Term Finder (Supplemental  
161 material 2), a high frequency of BFC autophagy proteome was found involved in  
162 reticulophagy —autophagy selective for the endoplasmic reticulum (2 proteins, Atg11p

163 and Ypt1p; out of a total of 9 proteins annotated in the *S. cerevisiae* proteome). On the  
164 other hand, under FC, many proteins were associated to macroautophagy (also highly  
165 frequent if considering the total *S. cerevisiae* autophagy proteome, see Supplemental  
166 material 2) and organelle organization. This last biological process is referred to the  
167 assembly, arrangement of constituent parts, or disassembly of an organelle within a cell,  
168 which are all frequent in growing cells and is the case of flor yeast under a nutrient-rich  
169 condition such as FC.

170 Yeasts autophagy involves several steps: i) regulation of induction, ii) vesicle  
171 nucleation, iii) cargo packaging, iv) vesicle expansion and completion, v) retrieval, vi)  
172 docking and fusion, vii) vesicle breakdown and viii) permease efflux (Table 1 and Fig.  
173 1). Two proteins (out of 26) with autophagy regulation function were quantified under  
174 BFC: Bcy1p and Pph21p (Fig. 2). The first inhibits protein kinase A (PKA) in the  
175 absence of cAMP (low levels when low glucose content) [35], that controls a variety of  
176 cellular processes and inhibits autophagy [2, 36, 37] while Pph21p, as well detected  
177 under FC, is a member of the Phosphatase 2A complex (PP2A) which is induced by  
178 TORC1 (one of the main regulators for autophagy along with PKA and Sch9 protein)  
179 and has an inhibitor function over the autophagosome formation genes. TORC1, PKA  
180 and Sch9 protein act as inhibitors of autophagosome formation. When autophagy  
181 triggering stimuli are perceived, these regulators are negatively induced [2, 36, 37].

182 With regards to FC, besides Pph21p other proteins with autophagy regulation  
183 function were quantified: Rts1p, also member of the PP2A complex, Sin3p (also known  
184 as Rpd1p) component of both the Rpd3S and Rpd3L histone deacetylase complexes that  
185 regulate transcription, silencing, autophagy (as an inhibitor) and other processes by  
186 influencing chromatin remodeling [38-41]; and Tor1p, subunit of TORC1 (Fig. 2).



187 From the 24 proteins involved in the autophagosome formation process in the *S.*  
188 *cerevisiae* proteome, only 1 was detected under FC, Shp1p. In this step, the  
189 autophagosome-generating machinery comprised of Atg proteins collectively form the  
190 pre-autophagosomal structure/phagophore assembly site (PAS) that will lead to the  
191 autophagosome vesicles. In addition, no proteins were found to take part in the vesicle  
192 nucleation step (initial stage of autophagosome vesicles formation) and two (out of 8 in  
193 *S. cerevisiae* proteome) in vesicle cargo packaging (Ald6p and Atg11p) under both BFC  
194 and FC. The cytosolic acetaldehyde dehydrogenase (Ald6p), specifically targeted to the  
195 vacuole by autophagosomes [42], was detected in high amounts under FC and log phase  
196 under rich conditions [29] (0.56 vs. 0.30 mol%, respectively) while under BFC remains  
197 much lower, 0.03 mol% (Fig. 2). The depletion of this protein has been used as a  
198 marker for the autophagy process [8, 42]. Under nutrient starvation conditions, the  
199 Ald6p in cells was quickly depleted because of preferential degradation of this protein  
200 during autophagy.

201 Small GTPase Rab Ypt1p was the only protein quantified to be involved in  
202 vesicle expansion/completion out of the 26 reported in *S. cerevisiae*. Its content under  
203 BFC was 0.19 mol% while under FC, 0.32 mol%. This autophagy step is coordinately  
204 performed by Atg proteins (Atg3p-5p, Atg7p, Atg8p, Atg10p, Atg12p, Atg16p),  
205 Sec2/4p and Ypt1p and complexes COG and TRAPP3 (Fig. 2).

206 Atg11p, which participates in the cargo packaging step as well, was the unique  
207 protein reported in the study, having a role in the pre-autophagosomal structure retrieval  
208 (to form new autophagosomes). Atg11p together with Atg23p, and Atg27p, facilitates  
209 the anterograde transport of Atg9p to the PAS. This process occurs whether the cells are  
210 maintained in starvation state or growing state through Cytoplasm-to-vacuole targeting  
211 (Cvt) pathway [43-45]. Cvt is a specific form and constitutive of autophagy that uses

212 autophagosomal-like vesicles for selective transport of hydrolases Lap4p and Ams1p to  
213 the vacuole [46, 47]. Depending on the nutrient condition, the vesicles engulfs two  
214 different cargo: Ams1p and Lap4p (under nitrogen-rich conditions) and be besides these  
215 hydrolases, bulk cytoplasm (upon nutrient starvation) (shown in Fig. 1).

216 Out of the 15 proteins that mediate the docking and fusion of the autophagosome  
217 to the vacuole, one was reported under BFC, Sec13p and two, Mon1p and Ykt6p at FC  
218 (Fig. 2). This step results in the release of autophagic bodies that are further  
219 disintegrated, and their contents degraded for reuse in biosynthesis. Sec13p besides  
220 autophagy, is involved in other processes [48, 49]. Meanwhile, Mon1p, in complex with  
221 Ccz1p (not identified), is required for multiple vacuole delivery pathways including the  
222 autophagy, pexophagy, endocytosis and cytoplasm-to-vacuole targeting (Cvt) pathway.  
223 None of the proteins involved in vesicle breakdown and permease efflux have been  
224 detected in the present experiment.

225 Another gene found to be relevant in autophagy and whose product was  
226 observed in the present analysis under FC, is the AAA-type ATPase *VPS4/CSCI*  
227 (Supplemental material 1). Vps4p is an AAA-type ATPase involved in multivesicular  
228 body protein sorting. Null mutant displays decreased autophagy while a gain-of-  
229 function mutant induces autophagy in rich medium [50, 51].

## 230 2. Autolysis

231 Hydrolytic enzymes as glucanases, proteases as well as nucleases play a major  
232 role in autolysis. Of all the enzymes involved, the activities of proteases have been the  
233 most extensively studied. According to Babayan et al. (1981) [52] yeast autolysis can be  
234 regarded as a four step process (Fig. 1): i) cell endostructures degradation and releasing  
235 vacuolar proteases in the cytoplasm, ii) inhibition of proteases and then activation due

236 to the inhibitors degradation, iii) polymer hydrolysis and hydrolysis products  
237 accumulation in the cell, and iv) cell wall degradation and hydrolysis products  
238 releasing. Under both conditions, high frequencies of autolysis proteins were involved  
239 specifically in “protein catabolic process in the vacuole” GO Term (Supplemental  
240 material 2).

241       Among the 12 vacuolar proteases in *S. cerevisiae*, 4 were reported under BFC  
242 and 5 under FC; nevertheless, contents were much higher under BFC: 1.97 vs. 0.63  
243 mol% being only 0.13 under nutrient-rich conditions (Table 1). Vacuolar proteases  
244 catalyze the non-specific degradation of cytoplasmic proteins, delocalized proteins from  
245 the secretory system, proteins delivered via autophagy, or plasma membrane proteins  
246 turned over via endocytosis [53-56]. Pep4p, the protein that most contributed to the  
247 mol% value in the BFC case, was quantified in 1.20 mol% which is over seven times  
248 higher than in FC, (0.16 mol%) (Fig. 3). Among the different types of proteases  
249 involved, Pep4p or Protease A is the main enzyme responsible for autolysis [57]. Lurton  
250 et al. (1989) [58] used specific proteases inhibitors to show that in acidic conditions,  
251 Pep4p was the principal enzyme involved in proteolysis during autolysis in a model  
252 wine system, despite numerous proteolytic enzymes present in yeast. This protein is  
253 required for posttranslational precursor maturation of other vacuolar proteinases,  
254 important for protein turnover after oxidative damage that may be occurring in BFC  
255 (flor yeast oxidative metabolism) and plays a protective role in acetic acid induced  
256 apoptosis [59-66]. Pep4p proteolytic activity is most efficient at acidic pH, as is the case  
257 of wines [67]. Some authors concluded that this protein is essential under conditions of  
258 nutrient starvation [60, 68]. Alexandre et al. (2001) [57] support the idea that although  
259 protease A activity appeared to be responsible for peptides release, there is no clear  
260 correlation among protease A activity, cell death, and autolysis. It was suggested that

261 protease A activity may be responsible for 80% of the nitrogen released during autolysis  
262 under optimum conditions. Using a  $\Delta$ pep4 mutant, Alexandre et al. (2001) [57] showed  
263 that protease A was responsible for 60% of the nitrogen released during autolysis in  
264 wine. These results suggest that other acidic proteases may also be involved in the  
265 proteolytic process. Consistent with this, Komano et al. (1999) and Olsen et al. (1999)  
266 [69, 70] have identified other acidic proteases (Yapsin proteases Mkc7p, Yps1p, Yps3p,  
267 Yps6p and Yps7p) but none of them were reported in this proteomic approach.  
268 However, other proteins such as the vacuolar peptidases Ape3p (amino-) and Prc1p  
269 (carboxy-) were identified under BFC over the value quantified in FC, catalyzing the  
270 vacuole degradation that removes amino acids from the carboxy termini of non-specific  
271 proteins and small peptides [71, 72].

272 Alexandre et al. 2001 [57] showed that the proteolytic activity of yeast increases  
273 up to six-fold after sugar exhaustion, which is the case of BFC, but decreases when  
274 yeast cell autolysis starts. Also, temperature, pH and the yeast strain affect proteolytic  
275 activity during aging [11, 73].

276 The released vacuolar proteases are initially inhibited by specific cytoplasmic  
277 inhibitors and are then activated due to their degradation. These inhibitors were only  
278 detected under BFC: Rfu1p with 0.06 mol% and Tfs1p with 0.26 mol% (Fig. 3). The  
279 first is the inhibitor of the Doa4p deubiquitinase (not reported) while Tfs1p is a specific  
280 and potent inhibitor of the vacuolar carboxypeptidase Y or Prc1p (quantified under  
281 BFC) [74, 75]. During log phase growth, Tfs1p is found in the cytoplasm; it is re-  
282 localized to the vacuole in stationary phase [76, 77]. Thus, as sampling was made at the  
283 middle of the log phase in both conditions, Tfs1p might be present in the cytoplasm  
284 exhibiting its inhibition function over the Prc1p released from the vacuole.

285 Besides proteases, glucanases and nucleases hydrolyze substrates under wine  
286 conditions [78-80]. In this approach, glucanases frequency was found higher under BFC  
287 (0.48 vs. 0.33%) but the difference was much bigger in terms of mol% content (1.48 vs.  
288 0.67 mol%). Nucleases, on the other hand, showed the opposite trend: 0.48 vs. 0.82% at  
289 FC and BFC, respectively; and 0.07 and 0.36 mol% (Table 1). More FC nucleases  
290 (DNases and RNases) are explained since the yeasts have a higher cell division rate  
291 under FC where conditions are more favorable than under BFC for reproduction. As  
292 expected, under nutrient rich condition at log phase where yeasts are not subjected to  
293 any stress, nucleases frequency and mol% values were higher than under BFC or FC  
294 [29].

295 Among BFC glucanases, cell wall enzyme endoglucanase Bgl2p reached a  
296 content of 1.01 mol% (not detected in FC) (Fig. 3), involved in beta-glucan degradation  
297 and also function biosynthetically as a transglycosylase [80]. It catalyzes the successive  
298 hydrolysis of beta-D-glucose units from the non-reducing ends of (1->3)-beta-D-  
299 glucans, releasing alpha-glucose [82]. It is also involved in incorporation of newly  
300 synthesized mannoprotein molecules into the cell wall and it introduces intrachain 1,6-  
301 beta linkages into 1,3-beta glucan, contributing to the rigid structure of the cell wall [81-  
302 83]. Another glucanase quantified in high values under both conditions was the cell wall  
303 exoglucanase Exg1p (0.48 and 0.51 mol% in BFC and FC, respectively). This enzyme  
304 hydrolyzes both 1,3-beta- and 1,6-beta-linkages and even has beta-glucosidase activity.  
305 It could also function biosynthetically as a transglycosylase. This enzyme releases  
306 alpha-glucose. The endo-1,3-beta-D-glucosidase Scw11p was only identified under FC  
307 which is involved in the cell separation and may play a role in conjugation during  
308 mating based on its regulation by Ste12p (not detected) [84, 85].

309           It should be mentioned that hydrolytic products start to be released when their  
310 molecular masses are low enough to cross pores in the cell wall and that the cell wall  
311 degradation is not a requirement. During autolysis, the yeast cell wall degrades.  
312 Charpentier and Freyssinet (1989) [78] showed that cell wall degradation could be  
313 summarized as follows: first, glucans are hydrolysed by glucanases, thus releasing  
314 mannoproteins trapped or covalently linked to the glucans; second, the glucans are  
315 released due to either residual activities of cell wall glucanases or solubilized glucanases  
316 in the medium and finally, the protein fraction of the mannoproteins is degraded by  
317 proteolysis. Further, we looked for mannosidases in the proteome data set trying to find  
318 some differences among conditions. Only one was reported under BFC and none under  
319 FC. The one reported is Dcw1p that is localized in the cell membrane and may  
320 contribute to the mannose residues releasing from cell wall mannoproteins. Although  
321 proteases and glucanases degrade the cell wall, there is no breakdown of the cell wall  
322 [86]. The cell wall remains unbroken, with many ridges and folds, nevertheless the  
323 yeast cells have lost most of their cytoplasmic content.

324           With regards to the plasma membrane, its fate during this process is not  
325 clarified, however lipid release has been reported in sparkling wine aging [1]. In this  
326 study, only two lipases (more specifically lysophospholipases) have been quantified:  
327 Plb1p (0.12 mol%) under BFC and Nte1p under FC with only 0.01 mol%.

### 328           3. *Apoptosis*

329           Since the first description of apoptosis in yeasts [87], several yeast orthologues  
330 of crucial mammalian apoptotic proteins have been discovered [88-93], and conserved  
331 proteasomal, mitochondrial, and histone-regulated apoptotic pathways have been  
332 delineated (Fig. 1) [94-100]. Apoptosis involves three main steps: the perception of an

333 external or internal signal, the signaling pathway phase and the execution phase that  
334 ends with the cell death. Apoptosis proteome in *S. cerevisiae* consists in 39 proteins.

335 Bir1p, Cpr3p, Kex1p, Mca1p, Pet9p, Por1p and Tdh2p were quantified under  
336 BFC 2-folding the FC content (Fig. 4). Por1p was the one showing highest difference  
337 among both conditions: 0.28 vs. none, under BFC and FC, respectively. This is the  
338 mitochondrial outer membrane protein porin 1 which gene deletion (yeast voltage-  
339 dependent anion channel) enhances apoptosis triggered by acetic acid, H<sub>2</sub>O<sub>2</sub> and  
340 diamide [101]. However, Liang and Zhou (2007) [102] proposed that this membrane  
341 protein enhances apoptosis in yeasts increasing resistance to apoptosis induced by Cu<sup>2+</sup>.  
342 Another protein showing significant differences in mol% that plays a central role in  
343 apoptosis, is Mca1p (see Fig. 4), reported under BFC with a content of 0.13 mol% while  
344 not identified under FC. It mediates apoptosis triggered by oxygen stress, salt stress or  
345 chronological aging or toxins and promotes the removal of insoluble protein aggregates  
346 during normal growth [88, 103]. *MCA1* plays a central role in yeast apoptosis, its  
347 deletion of the enhances the resistance against oxidative stress and delays age-induced  
348 cell death [88], although caspase-independent apoptosis occurs in yeast as well [104,  
349 105].

350 Although with less content, another protein identified under BFC (0.08 mol%)  
351 and not under FC was Pet9p (Fig. 4). It catalyzes the exchange of ADP and ATP across  
352 the mitochondrial inner membrane. Genetic evidence indicates a possible role of the  
353 ADP/ATP carriers (AAC): Aac1p, Aac3p and Pet9p (Aac2p); in apoptosis [101].  
354 Among them Pet9p is the major isoform of the translocator [106]. Pereira et al. (2007)  
355 [101] specifically pointed to a crucial role of AAC in yeast apoptosis as it is required for  
356 mitochondrial outer membrane permeabilization and cytochrome c release through the  
357 process (Fig. 1).

358 Two other proteins detected only under BFC but with less content were Bir1p  
359 and Kex1p. The first is an antiapoptotic protein that contains three Baculovirus IAP  
360 repeat domains, a protein motif which is usually found in inhibitor-of-apoptosis proteins  
361 [107] and appears to play independent roles in chromosome stability and apoptosis [93].  
362 Kex1p, on the other hand, is a protease with a carboxypeptidase B-like function,  
363 involved in the C-terminal processing of the lysine and arginine residues from the  
364 precursors of K1, K2 and K28 killer toxins and a-factor (mating pheromone), in the  
365 programmed cell death caused by defective N-glycosylation and contributes to the  
366 active cell death program induced by acetic acid stress or during chronological aging  
367 [108].

368 Cpr3p, a yeast cyclophilin D homologue, was quantified under both conditions  
369 although in significantly higher content under BFC (0.52 vs. 0.12 mol%). Liang and  
370 Zhou (2007) [102] performed a genetic screen in which identified Cpr3p as activating  
371 the Cu<sup>2+</sup>-induced apoptotic program. Other protein folding the content under BFC is  
372 Tdh2p. Almeida et al. (2007) [4] by combining proteomic, genetic and biochemical  
373 approaches demonstrated that Nitric oxide (NO) and glyceraldehyde-3-phosphate  
374 dehydrogenase (GAPDH) as Tdh2p are crucial mediators of yeast H<sub>2</sub>O<sub>2</sub>-induced  
375 apoptosis, concluding that NO signaling and GAPDH S-nitrosation are linked with  
376 H<sub>2</sub>O<sub>2</sub>-induced apoptotic cell death. Evidence is presented showing that NO and GAPDH  
377 S-nitrosation also mediate cell death during chronological life span pointing to a  
378 physiological role of NO in yeast apoptosis. Further another GAPDH, Tdh3p was  
379 detected in very high amounts under both conditions (0.98 vs. 1.03 mol% under BFC  
380 and FC, respectively). The high presence of these proteins under FC could be explained  
381 since this protein is highly relevant in glycolysis which is essential under a typical  
382 fermentative condition.



383 Under FC, proteins like Oye2p and Ras2p were found specifically under this  
384 condition. The multifunctional protein Cdc48p doubled the content at this condition.  
385 Full length *OYE2* overexpression lowers endogenous reactive oxygen species (ROS),  
386 increases resistance to H<sub>2</sub>O<sub>2</sub>-induced programmed cell death (PCD) and significantly  
387 lowers ROS levels generated by organic prooxidants [109]. Reciprocally, oye2 yeast  
388 strains are sensitive to prooxidant-induced PCD. Odat O, et al. (2007) [110] firmly  
389 placed OYE proteins in the signaling network connecting ROS generation, PCD  
390 modulation and cytoskeletal dynamics in yeast (Fig. 1). Ras2p induces the production  
391 on ROS while Cdc48p is an antiapoptotic protein [110].

## 392 Discussion

393 The scarce proteins related to the autophagy process in both studied conditions  
394 (lower at BFC) along with the presence reported of the several autophagy inhibitors,  
395 points out a down-regulation of the autophagy genome in flor yeasts under BFC or FC.  
396 Further, the presence of Atg8p, an autophagy key protein that has been used as an  
397 experimental marker for autophagosomes, was neither quantified. The depletion of  
398 Ald6p is used as a as a marker for the autophagy process as it is specifically targeted to  
399 the vacuole by autophagosomes. The lower amount in BFC compared with FC and log  
400 phase under rich-medium, represents an isolated fact that may indicate a progress in the  
401 autophagy process under BFC or, on the other hand, that the yeast stopped its synthesis  
402 at a certain point probably because its function is not relevant or is substituted by other  
403 Aldps such as Ald2p and Ald3p, which genes are both induced in response to ethanol or  
404 stress and repressed by glucose [111].

405 Flor yeasts under fermentative condition (FC) show higher values in frequency  
406 and content of autophagy proteins. Under a nutrient-rich condition such as FC, the  
407 autophagy role may be the reorganization of organelles, typical in growing cells, rather

408 than material degradation that occurs in starving yeasts. The presence of Vps4p  
409 (relevant in autophagy) at this condition may indicate that autophagy is being induced at  
410 some extent. Piggot et al. (2011) [16] demonstrated that autophagy is induced early in  
411 wine fermentation in a nitrogen-replete environment, suggesting that autophagy may be  
412 triggered by other forms of stress that arise during fermentation. These authors also  
413 stated that autophagy genes are required for optimal survival throughout fermentation.

414 Autolysis and apoptosis proteome showed the opposite tendency of the  
415 autophagy in terms of frequency and protein content values, both higher under BFC.  
416 BFC vacuolar proteases triplicated those at FC in abundance while Pep4p, considered as  
417 the main responsible protein of the nitrogen release in wine autolysis [57], was the  
418 protein that most contributed to the content value in the autolysis BFC proteome, thus  
419 supporting other references that reported autolysis at biological aging. Moreover, this  
420 protease may be active under BFC as the pH is acidic and there are no sugars [21, 57].  
421 Glucanases possibly play a role in cell expansion during growth, in cell-cell fusion  
422 during mating, and in spore release during sporulation. For this reason, these hydrolases  
423 might also be important under a condition with high growth rate, however, more  
424 glucanases in higher contents were reported under BFC pointing out that there is  
425 another process or are other processes that also requires this function (like autolysis).  
426 The high amounts of the cell wall glucanases Bgl2p and Exg1p in BFC can lead to cell  
427 wall glucans degradation.

428 Apoptosis proteins, as expected, were found more abundant under BFC than  
429 under FC, showing Cpr3p, Mca1p, Por1p, Tdh2/3p with very high values. Under BFC,  
430 flor yeasts are subjected to a carbon starvation in which they are able to form a biofilm  
431 community. The self-destruction of damaged and old yeast cells, which consume  
432 dwindling nutrients, may contribute to the viability and reproductive success of

433 healthier members of the community. The fact that high amounts of apoptosis activators  
434 as Mca1p or Cpr3p were quantified while none or very little amounts under FC, may  
435 point out that apoptosis is happening when the flor yeast is forming flor, which has  
436 never been reported before to our knowledge. Apoptotic death in yeast is suggested to  
437 be accompanied, at least under certain cases, by transfer of genetic material between  
438 cells [112]. This may be considered as a reason to explain why flor yeasts and  
439 fermentative yeasts differ genetically.

440         This study provides evidences about the autophagy, autolysis and apoptosis  
441 biological processes in flor yeasts when subjected to biofilm and fermentative  
442 conditions. However, besides proteomics, further works dealing with genetic  
443 approaches, deeper metabolomic analyses (including amino acids), transmission  
444 electron microscopy imaging, protein enzymatic activity and utilization of different flor  
445 yeast strains are required in order to achieve more solid conclusions. All said techniques  
446 could be considered and aimed to improve the knowledge of yeast behavior under  
447 different enological conditions and further improve quality of wines. Moreover,  
448 detecting apoptosis proteins in flor yeast biofilms highlights the potential use of these  
449 strains as unicellular eukaryotic models to study apoptosis for medical purposes.

#### 450 **Acknowledgements**

451         This work was supported by the “XXII Programa Propio de Fomento de la  
452 Investigación 2017” (MOD.4.1 P.P.2016 J.J. MORENO V.) from the University of  
453 Cordoba (Spain). The authors thank Minami Ogawa for her assistance with English  
454 language editing.

#### 455 **References**

- 456 1. Alexandre H, Benatier M. 2006. Yeast autolysis in sparkling wine—a review. Aust J  
457 Grape Wine Res 12:119–127.
- 458 2. Budovskaya YV, Stephan JS, Reggiori F, Klionsky DJ, Herman PK. 2004. The  
459 Ras/cAMP-dependent protein kinase signaling pathway regulates an early step of the  
460 autophagy process in *Saccharomyces cerevisiae*. J Biol Chem 279:20663–20671.
- 461 3. Almeida B, Buttner S, Ohlmeier S, Silva A, Mesquita A, Sampaio-Marques B,  
462 Osório NS, Kollau A, Mayer B, Leão C, Laranjinha J. 2007. NO-mediated apoptosis in  
463 yeast. J Cell Sci 120:3279–3288.
- 464 4. Rego A, Trindade D, Chaves SR, Manon S, Costa V, Sousa MJ, Côrte-Real M. 2014.  
465 The yeast model system as a tool towards the understanding of apoptosis regulation by  
466 sphingolipids. FEMS Yeast Res 14:160–178.
- 467 5. Reggiori F, Klionsky DJ. 2013. Autophagic processes in yeast: mechanism,  
468 machinery and regulation. Genetics 194:341–61.
- 469 6. Cebollero E, Carrascosa AV, Gonzalez R. 2005. Evidence for yeast autophagy during  
470 simulation of sparkling wine aging: a reappraisal of the mechanism of yeast autolysis in  
471 wine. Biotechnol Prog 21:614–616.
- 472 7. Babayan TL, Bezrukov MG. 1985. Autolysis in yeasts. Eng Life Sci 5:129–136.
- 473 8. Cebollero E, Gonzalez R. 2006. Induction of autophagy by second-fermentation  
474 yeasts during elaboration of sparkling wines. Appl Environ Microbiol 72:4121–4127.
- 475 9. Yousefi S, Simon HU. 2007. Apoptosis regulation by autophagy gene 5. Crit Rev  
476 Oncol/Hematol 63:241–244.
- 477 10. Kelly-Treadwell PH. 1988. Protease activity in yeast: its relationship to autolysis  
478 and champagne character. Australian Grapegrower and Winemaker (Australia).

- 479 11. Leroy MJ, Charpentier M, Duteurtre B, Feuillat M, Charpentier C. 1990. Yeast  
480 autolysis during champagne aging. *Am J Enol Vitic* 41:21–28.
- 481 12. Moreno-Arribas V, Pueyo E, Nieto FJ, Martín-Alvarez PJ, Polo MC. 2000.  
482 Influence of the polysaccharides and the nitrogen compounds on foaming properties of  
483 sparkling wines. *Food Chem* 70:309–317.
- 484 13. Moreno-Arribas V, Pueyo E, Polo MC. 1996. Peptides in musts and wines. Changes  
485 during the manufacture of cava (sparkling wines). *J Agric Food Chem* 44:3783–3788.
- 486 14. Pueyo E, Martín-Alvarez PJ, Polo MC. 1995. Relationship between foam  
487 characteristics and chemical composition in wines and cava (sparkling wines). *Am J*  
488 *Enol Vitic* 46:518–524.
- 489 15. Martínez-Rodríguez AJ, González R, Carrascosa AV. 2004. Morphological changes  
490 in autolytic wine yeast during aging in two model systems. *J Food Sci* 1:233–239.
- 491 16. Piggott N, Cook MA, Tyers M, Measday V. 2011. Genome-wide fitness profiles  
492 reveal a requirement for autophagy during yeast fermentation. *G3: G3-Genes Genomes*  
493 *Genet* 1:353–367.
- 494 17. Orozco H, Matallana E, Aranda A. 2013. Genetic manipulation of longevity-related  
495 genes as a tool to regulate yeast life span and metabolite production during winemaking.  
496 *Microb Cell Fact* 12:1–14.
- 497 18. Alexandre H. 2013. Flor yeasts of *Saccharomyces cerevisiae*-Their ecology,  
498 genetics and metabolism. *Int J Food Microbiol* 167:269–275.
- 499 19. Peinado RA, Mauricio JC. 2009. Biologically aged wines, p 81-101. *In* Moreno-  
500 Arribas, MV, Polo MC (ed), *Wine Chemistry and Biochemistry*. Springer, New York,  
501 NY.

- 502 20. Charpentier C, Santos DAM, Feuillat M. 2004. Release of macromolecules by  
503 *Saccharomyces cerevisiae* during ageing of French flor sherry wine “Vin jaune”. Int J  
504 Food Microbiol 96:253–262.
- 505 21. Moreno-García J, García-Martínez T, Moreno J, Millán MC, Mauricio JC. 2014. A  
506 proteomic and metabolomic approach for understanding the role of the flor yeast  
507 mitochondria in the velum formation. Int J Food Microbiol 172:21–29.
- 508 22. Xie Z, Nair U, Klionsky DJ. 2008 Atg8 controls phagophore expansion during  
509 autophagosome formation. Mol Biol Cell 19:3290–3298.
- 510 23. Onodera J, Ohsumi Y. 2004. Ald6p is a preferred target for autophagy in yeast,  
511 *Saccharomyces cerevisiae*. J Biol Chem 279:16071–16076.
- 512 24. Moreno-García J, García-Martínez T, Moreno J, Mauricio JC. 2015. Proteins  
513 involved in flor yeast carbon metabolism under biofilm formation conditions. Food  
514 Microbiol 46:25–33.
- 515 25. Moreno-García J, García-Martínez T, Millán MC, Mauricio JC, Moreno J. 2015.  
516 Proteins involved in wine aroma compounds metabolism by a *Saccharomyces*  
517 *cerevisiae* flor-velum yeast strain grown in two conditions. Food Microbiol 51:1–9.
- 518 26. Moreno-García J, Mauricio JC, Moreno J, García-Martínez T. 2016. Stress  
519 responsive proteins of a flor yeast strain during the early stages of biofilm formation.  
520 Process Biochem 51:578–588.
- 521 27. Moreno-García J, Mauricio JC, Moreno J, García-Martínez T. 2017. Differential  
522 proteome analysis of a flor yeast strain under biofilm formation. Int J Mol Sci 18:1–18.

- 523 28. Mauricio JC, Moreno JJ, Ortega JM. 1997. In vitro specific activities of alcohol and  
524 aldehyde dehydrogenases from two flor yeasts during controlled wine aging. *J Agric*  
525 *Food Chem* 45:1967–1971.
- 526 29. Ghaemmaghami S, Huh W-KK, Bower K, Howson RW, Belle A, Dephoure N,  
527 O'Shea EK, Weissman JS. 2003. Global analysis of protein expression in yeast. *Nature*  
528 425:737–741.
- 529 30. Salvado Z, Chiva R, Rodriguez-Vargas S, Randez-Gil F, Mas A, Guillamon JM.  
530 2008. Proteomic evolution of a wine yeast during the first hours of fermentation. *FEMS*  
531 *Yeast Res* 8:1137–1146.
- 532 31. Gutiérrez P, Roldán A, Caro I, Pérez L. 2010. Kinetic study of the velum formation  
533 by *Saccharomyces cerevisiae* (*beticus* ssp.) during the biological aging of wines.  
534 *Process Biochem* 45:493–499.
- 535 32. Rodríguez ME, Infante JJ, Mesa JJ, Rebordinos L, Cantoral JM. 2013. Enological  
536 behaviour of biofilms formed by genetically-characterized strains of Sherry flor yeast.  
537 *Open Biotechnol J* 7:23–29.
- 538 33. Ishihama Y, Oda Y, Tabata T, Sato T, Nagasu T, Rappsilber J, Mann M. 2005.  
539 Exponentially modified protein abundance index (emPAI) for estimation of absolute  
540 protein amount in proteomics by the number of sequenced peptides per protein. *Mol*  
541 *Cell Proteomics* 4:1265–1272.
- 542 34. *Saccharomyces* Genome Database. <https://www.yeastgenome.org/> (25 April 2018,  
543 date last accessed).

- 544 35. Uno I, Matsumoto K, Ishikawa T. 1982. Characterization of cyclic AMP-requiring  
545 yeast mutants altered in the regulatory subunit of protein kinase. *J Biol Chem*  
546 257:14110–14115.
- 547 36. Yorimitsu T, Klionsky DJ. 2007. Endoplasmic reticulum stress: a new pathway to  
548 induce autophagy. *Autophagy* 3:160–162
- 549 37. Noda T, Ohsumi Y. 1998. Tor, a phosphatidylinositol kinase homologue, controls  
550 autophagy in yeast. *J Biol Chem* 273:3963–3966.
- 551 38. Silverstein RA, Ekwall K. 2005. Sin3: a flexible regulator of global gene expression  
552 and genome stability. *Curr Genet* 47:1–17.
- 553 39. Carrozza MJ, Florens L, Swanson SK, Shia WJ, Anderson S, Yates J, Washburn  
554 MP, Workman JL. 2005. Stable incorporation of sequence specific repressors Ash1 and  
555 Ume6 into the Rpd3L complex. *Biochim. Biophys Acta-Gene Struct* 1731:77–87.
- 556 40. Bernstein BE, Tong JK, Schreiber SL. 2000. Genomewide studies of histone  
557 deacetylase function in yeast. *Proc Natl Acad Sci USA* 97:13708–13713.
- 558 41. Aihara M, Jin X, Kurihara Y, Yoshida Y, Matsushima Y, Oku M, Hirota Y, Saigusa  
559 T, Aoki Y, Uchiumi T, Yamamoto T. 2014. Tor and the Sin3–Rpd3 complex regulate  
560 expression of the mitophagy receptor protein Atg32 in yeast. *J Cell Sci* 127:3184–3196.
- 561 42. Onodera J, Ohsumi Y. 2004. Ald6p is a preferred target for autophagy in yeast,  
562 *Saccharomyces cerevisiae*. *J Biol Chem* 279:16071–16076.
- 563 43. Cheong H, Nair U, Geng J, Klionsky DJ. 2008. The Atg1 kinase complex is  
564 involved in the regulation of protein recruitment to initiate sequestering vesicle  
565 formation for nonspecific autophagy in *Saccharomyces cerevisiae*. *Mol Biol Cell*  
566 19:668–681.



- 567 44. Shintani T, Klionsky DJ. 2004. Cargo proteins facilitate the formation of transport  
568 vesicles in the cytoplasm to vacuole targeting pathway. *J Biol Chem* 279:29889–29894.
- 569 45. He C, Song H, Yorimitsu T, Monastyrska I, Yen WL, Legakis JE, Klionsky DJ.  
570 2006. Recruitment of Atg9 to the preautophagosomal structure by Atg11 is essential for  
571 selective autophagy in budding yeast. *J Cell Biol* 175:925–935.
- 572 46. Harding TM, Hefner-Gravink A, Thumm M, Klionsky DJ. 1996. Genetic and  
573 phenotypic overlap between autophagy and the cytoplasm to vacuole protein targeting  
574 pathway. *J Biol Chem* 271:17621–17624.
- 575 47. Yorimitsu T, Klionsky DJ. 2005. Atg11 links cargo to the vesicle-forming  
576 machinery in the cytoplasm to vacuole targeting pathway. *Mol Biol Cell* 16:1593–1605.
- 577 48. Bonifacino JS, Glick BS. 2004. The mechanisms of vesicle budding and fusion. *Cell*  
578 116:153–166.
- 579 49. Dokudovskaya S, Waharte F, Schlessinger A, Pieper U, Devos DP, Cristea IM,  
580 Williams R, Salamero J, Chait BT, Sali A, Field MC. 2011. A conserved coatomer-  
581 related complex containing Sec13 and Seh1 dynamically associates with the vacuole in  
582 *Saccharomyces cerevisiae*. *Mol Cell Proteomics* 10:1–17.
- 583 50. Nebauer R, Rosenberger S, Daum G. 2007. Phosphatidylethanolamine, a limiting  
584 factor of autophagy in yeast strains bearing a defect in the carboxypeptidase Y pathway  
585 of vacuolar targeting. *J Biol Chem* 282:16736–16743.
- 586 51. Shirahama K, Noda T, Ohsumi Y. 1997. Mutational analysis of Csc1/Vps4p:  
587 involvement of endosome in regulation of autophagy in yeast. *Cell Struct Funct* 22:501–  
588 509.

- 589 52. Babayan TL, Bezrukov MG, Latov VK, Belikov VM, Belavtseva EM, Titova EF.  
590 1981. Induced autolysis of *Saccharomyces cerevisiae*: morphological effects,  
591 rheological effects, and dynamics of accumulation of extracellular hydrolysis products.  
592 *Curr Microbiol* 5:163–168.
- 593 53. Chiang HL, Schekman R. 1991. Regulated import and degradation of a cytosolic  
594 protein in the yeast vacuole. *Nature* 350:313–318.
- 595 54. Robinson JS, Klionsky DJ, Banta LM, Emr SD. 1988. Protein sorting in  
596 *Saccharomyces cerevisiae*: isolation of mutants defective in the delivery and processing  
597 of multiple vacuolar hydrolases. *Mol Cell Biol* 8:4936–4948.
- 598 55. Klionsky DJ, Emr SD. 2000. Autophagy as a regulated pathway of cellular  
599 degradation. *Science* 290:1717–1721.
- 600 56. Hicke L. 1997. Ubiquitin-dependent internalization and down-regulation of plasma  
601 membrane proteins. *FASEB J* 11:1215–1226.
- 602 57. Alexandre H, Heintz D, Chassagne D, Guilloux-Benatier M, Charpentier C, Feuillat  
603 M. 2001. Protease A activity and nitrogen fractions released during alcoholic  
604 fermentation and autolysis in enological conditions. *J Ind Microbiol Biotechnol* 26:235–  
605 240.
- 606 58. Lurton L, Segain JP, Feuillat M. 1989. Etude de la protéolyse au cours de l'autolyse  
607 de levures au milieu acide. *Sci Aliments* 9:111–123.
- 608 59. Pereira H, Azevedo F, Rego A, Sousa MJ, Chaves SR, Côte-Real M. 2013. The  
609 protective role of yeast Cathepsin D in acetic acid-induced apoptosis depends on ANT  
610 (Aac2p) but not on the voltage-dependent channel (Por1p). *FEBS Lett* 587:200–205.

- 611 60. Marques M, Mojzita D, Amorim MA, Almeida T, Hohmann S, Moradas-Ferreira P,  
612 Costa V. 2006. The Pep4p vacuolar proteinase contributes to the turnover of oxidized  
613 proteins but *PEP4* overexpression is not sufficient to increase chronological lifespan in  
614 *Saccharomyces cerevisiae*. *Microbiology* 152:3595–3605.
- 615 61. Wolff AM, Din N, Petersen JGL. 1996. Vacuolar and extracellular maturation of  
616 *Saccharomyces cerevisiae* proteinase A. *Yeast* 12:823–832
- 617 62. Rupp S, Wolf DH. 1995. The use of active-site mutants of proteinase yscA to  
618 determine the necessity of the enzyme for vacuolar proteinase maturation and proteinase  
619 yscB stability. *Eur J Biochem/FEBS* 231:115–125.
- 620 63. van den Hazel HB, Kielland-Brandt MC, Winther JR. 1993. The propeptide is  
621 required for in vivo formation of stable active yeast proteinase A and can function even  
622 when not covalently linked to the mature region. *J Biol Chem* 268:18002–18007.
- 623 64. Hazel HB, Kielland-Brandt MC, Winther JR. 1992. Autoactivation of proteinase A  
624 initiates activation of yeast vacuolar zymogens. *Eur J Biochem* 207:277–283.
- 625 65. Ammerer G, Hunter CP, Rothman JH, Saari GC, Valls LA, Stevens TH. 1986.  
626 *PEP4* gene of *Saccharomyces cerevisiae* encodes proteinase A, a vacuolar enzyme  
627 required for processing of vacuolar precursors. *Mol Cell Biol* 6:2490–2499.
- 628 66. Woolford CA, Daniels LB, Park FJ, Jones EW, Van Arsdell JN, Innis MA. 1986.  
629 The *PEP4* gene encodes an aspartyl protease implicated in the posttranslational  
630 regulation of *Saccharomyces cerevisiae* vacuolar hydrolases. *Mol Cell Biol* 6:2500–  
631 2510.

- 632 67. Sorensen SO, Vandenhazel HB, Kiellandbrandt MC, Winther JR. 1994. pH-  
633 dependent processing of yeast procarboxypeptidase Y by proteinase A in vivo and in  
634 vitro. *Eur J Biochem* 220:19–27.
- 635 68. Teichert U, Mechler B, Müller H, Wolf DH. 1989. Lysosomal (vacuolar)  
636 proteinases of yeast are essential catalysts for protein degradation, differentiation, and  
637 cell survival. *J Biol Chem* 264:16037–16045.
- 638 69. Komano H, Rockwell N, Wang GT, Krafft GA, Fuller RS. 1999. Purification and  
639 characterization of the yeast glycosylphosphatidylinositol-anchored, monobasic-specific  
640 aspartyl protease yapsin 2 (Mkc7p). *J Biol Chem* 274:24431–24437.
- 641 70. Olsen V, Cawley NX, Brandt J, Egel-Mitani M, Loh YP. 1999. Identification and  
642 characterization of *Saccharomyces cerevisiae* yapsin 3, a new member of the yapsin  
643 family of aspartic proteases encoded by the *YPS3* gene. *Biochem J* 339:407–411.
- 644 71. Yasuhara T, Nakai T, Ohashi A. 1994. Aminopeptidase Y, a new aminopeptidase  
645 from *Saccharomyces cerevisiae*. Purification, properties, localization, and processing by  
646 protease B. *J Biol Chem* 269:13644–13650.
- 647 72. van den Hazel HB, Kielland-Brandt MC, Winther JR. 1996. Review: biosynthesis  
648 and function of yeast vacuolar proteases. *Yeast* 2:1–6.
- 649 73. Sato M, Suzuki Y, Hanamure KI, Katoh I, Yagi Y, Otsuka KI. 1997. Winemaking  
650 from Koshu variety by the sur lie method: behavior of free amino acids and proteolytic  
651 activities in the wine. *Am J Enol Vitic* 48:1–6.
- 652 74. Papa FR, Amerik AY, Hochstrasser M. 1999. Interaction of the Doa4  
653 deubiquitinating enzyme with the yeast 26S proteasome. *Mol Biol Cell* 10:741–756.

- 654 75. Bruun AW, Svendsen I, Sørensen SO, Kielland-Brandt MC, Winther JR. 1998. A  
655 high-affinity inhibitor of yeast carboxypeptidase Y is encoded by *TFSI* and shows  
656 homology to a family of lipid binding proteins. *Biochemistry* 37:3351–3357.
- 657 76. Mima J, Fukada H, Nagayama M, Ueda M. 2006. Specific membrane binding of the  
658 carboxypeptidase Y inhibitor IC, a phosphatidylethanolamine-binding protein family  
659 member. *Eur J Biochem* 273:5374–5383.
- 660 77. Fukada H, Mima J, Nagayama M, Kato M, Ueda M. 2007. Biochemical analysis of  
661 the yeast proteinase inhibitor (IC) homolog ICh and its comparison with IC. *Biosci*  
662 *Biotechnol Biochem* 71:472–480.
- 663 78. Charpentier C, Freyssinet M. 1989. The mechanism of yeast autolysis in wine.  
664 *Yeast* 5:181–186.
- 665 79. Martinez-Rodriguez AJ, Carrascosa AV, Martin-Alvarez PJ, Moreno-Arribas V,  
666 Polo MC. 2002. Influence of the yeast strain on the changes of the amino acids, peptides  
667 and proteins during sparkling wine production by the traditional method. *J Ind*  
668 *Microbiol Biotechnol* 29:314–322.
- 669 80. Zhao J, Fleet GH. 2005. Degradation of RNA during the autolysis of  
670 *Saccharomyces cerevisiae* produces predominantly ribonucleotides. *J Ind Microbiol*  
671 *Biotechnol* 32:415–423.
- 672 81. Plotnikova TA, Selyakh IO, Kalebina TS, Kulaev IS. 2006. Bgl2p and Gas1p are the  
673 major glucan transferases forming the molecular ensemble of yeast cell wal. *Dokl*  
674 *Biochem Biophys* 409:244–247.

- 675 82. Mrsa V, Klebl F, Tanner W. 1993. Purification and characterization of the  
676 *Saccharomyces cerevisiae* *BGL2* gene product, a cell wall endo-beta-1, 3-glucanase. J  
677 Bacteriol 175:2102–2106.
- 678 83. Klebl F, Tanner W. 1989. Molecular cloning of a cell wall exo-beta-1, 3-glucanase  
679 from *Saccharomyces cerevisiae*. J Bacteriol 171:6259–6264.
- 680 84. Cappellaro C, Mrsa V, Tanner W. 1998. New potential cell wall glucanases of  
681 *Saccharomyces cerevisiae* and their involvement in mating. J Bacteriol 180:5030–5037.
- 682 85. Zeitlinger J, Simon I, Harbison CT, Hannett NM, Volkert TL, Fink GR, Young RA.  
683 2003. Program-specific distribution of a transcription factor dependent on partner  
684 transcription factor and MAPK signaling. Cell 113:395–404.
- 685 86. Vosti DC, Joslyn MA. 1954. Autolysis of bakers' yeast. Appl Microbiol 2:70–78.
- 686 87. Madeo F, Fröhlich E, Fröhlich KU. 1997. A yeast mutant showing diagnostic  
687 markers of early and late apoptosis. J Cell Biol 139:729–734.
- 688 88. Madeo F, Herker E, Maldener C, Wissing S, Lächelt S, Herlan M, Fehr M, Lauber  
689 K, Sigrist SJ, Wesselborg S, Fröhlich KU. 2002. A caspase-related protease regulates  
690 apoptosis in yeast. Mol Cell 9:911–917.
- 691 89. Fahrenkrog B, Sauder U, Aebi U. 2004. The *S. cerevisiae* HtrA-like protein  
692 Nma111p is a nuclear serine protease that mediates yeast apoptosis. J Cell Sci 117:115–  
693 126.
- 694 90. Wissing S, Ludovico P, Herker E, Büttner S, Engelhardt SM, Decker T, Link A,  
695 Proksch A, Rodrigues F, Corte-Real M, Fröhlich KU. 2004. An AIF orthologue  
696 regulates apoptosis in yeast. J Cell Biol 166:969–974.

- 697 91. Qiu J, Yoon JH, Shen B. 2005. Search for apoptotic nucleases in yeast role of Tat-D  
698 nuclease in apoptotic DNA degradation. *J Biol Chem* 280:15370–15379.
- 699 92. Li W, Sun L, Liang Q, Wang J, Mo W, Zhou B. 2006. Yeast AMID homologue  
700 Ndi1p displays respiration-restricted apoptotic activity and is involved in chronological  
701 aging. *Mol Biol Cell* 17:1802–1811.
- 702 93. Walter D, Wissing S, Madeo F, Fahrenkrog B. 2006. The inhibitor-of-apoptosis  
703 protein Bir1p protects against apoptosis in *S. cerevisiae* and is a substrate for the yeast  
704 homologue of Omi/HtrA2. *J Cell Sci* 119:1843–1851.
- 705 94. Manon S, Chaudhuri B, Guérin M. 1997. Release of cytochrome c and decrease of  
706 cytochrome c oxidase in Bax-expressing yeast cells, and prevention of these effects by  
707 coexpression of Bcl-xL. *FEBS Lett* 415:29–32.
- 708 95. Ligr M, Velten I, Fröhlich E, Madeo F, Ledig M, Fröhlich KU, Wolf DH, Hilt W.  
709 2001. The proteasomal substrate Stm1 participates in apoptosis-like cell death in yeast.  
710 *Mol Biol Cell* 12:2422–2432.
- 711 96. Ludovico P, Rodrigues F, Almeida A, Silva MT, Barrientos A, Côrte-Real M. 2002.  
712 Cytochrome c release and mitochondria involvement in programmed cell death induced  
713 by acetic acid in *Saccharomyces cerevisiae*. *Mol Biol Cell* 13:2598–2606.
- 714 97. Fannjiang Y, Cheng WC, Lee SJ, Qi B, Pevsner J, McCaffery JM, Hill RB, Basañez  
715 G, Hardwick JM. 2004. Mitochondrial fission proteins regulate programmed cell death  
716 in yeast. *Genes Dev* 18:2785–2797.
- 717 98. Ahn SH, Cheung WL, Hsu JY, Diaz RL, Smith MM, Allis CD. 2005. Sterile 20  
718 kinase phosphorylates histone H2B at serine 10 during hydrogen peroxide-induced  
719 apoptosis in *S. cerevisiae*. *Cell* 120:25–36.

- 720 99. Gourlay CW, Ayscough KR. 2005. Identification of an upstream regulatory pathway  
721 controlling actin-mediated apoptosis in yeast. *J Cell Sci* 118:2119–2132.
- 722 100. Pozniakovsky AI, Knorre DA, Markova OV, Hyman AA, Skulachev VP, Severin  
723 FF. 2005. Role of mitochondria in the pheromone-and amiodarone-induced  
724 programmed death of yeast. *J Cell Biol* 17, 168:257–269.
- 725 101. Pereira C, Camougrand N, Manon S, Sousa MJ, Côte-Real M. 2007. ADP/ATP  
726 carrier is required for mitochondrial outer membrane permeabilization and cytochrome  
727 c release in yeast apoptosis. *Mol Microbiol* 66:571–582.
- 728 102. Liang Q, Zhou B. 2007. Copper and manganese induce yeast apoptosis via  
729 different pathways. *Mol Biol Cell* 18:4741–4749.
- 730 103. Lee RE, Brunette S, Puente LG, Megeney LA. 2010. Metacaspase Yca1 is required  
731 for clearance of insoluble protein aggregates. *Proc Natl Acad Sci USA* 107:13348–  
732 13353.
- 733 104. Guscetti F, Nath N, Denko N. 2005. Functional characterization of human  
734 proapoptotic molecules in yeast *S. cerevisiae*. *FASEB J* 19:464–466.
- 735 105. Zhang NN, Dudgeon DD, Paliwal S, Levchenko A, Grote E, Cunningham KW.  
736 2006. Multiple signaling pathways regulate yeast cell death during the response to  
737 mating pheromones. *Mol Biol Cell* 17:3409–3422.
- 738 106. Smith CP, Thorsness PE. 2008. The molecular basis for relative physiological  
739 functionality of the ADP/ATP carrier isoforms in *Saccharomyces cerevisiae*. *Genetics*  
740 179:1285–1299.



- 741 107. Uren AG, Beilharz T, O'Connell MJ, Bugg SJ, van Driel R, Vaux DL, Lithgow T.  
742 1999. Role for yeast inhibitor of apoptosis (IAP)-like proteins in cell division. *Proc Natl*  
743 *Acad Sci USA* 96:10170–10175.
- 744 108. Carmona-Gutierrez D, Alavian-Ghavanini A, Habernig L, Bauer M, Hammer A,  
745 Rossmann C, Zimmermann A, Ruckstuhl C, Büttner S, Eisenberg T, Sattler W. 2013.  
746 The cell death protease Kex1p is essential for hypochlorite-induced apoptosis in yeast.  
747 *Cell Cycle* 12:1704–1712.
- 748 109. Odat O, Matta S, Khalil H, Kampranis SC, Pfau R, Tsihliis PN, Makris AM. 2007.  
749 Old yellow enzymes, highly homologous FMN oxidoreductases with modulating roles  
750 in oxidative stress and programmed cell death in yeast. *J Biol Chem* 282:36010–36023.
- 751 110. Büttner S, Eisenberg T, Herker E, Carmona-Gutierrez D, Kroemer G, Madeo F.  
752 2006. Why yeast cells can undergo apoptosis: death in times of peace, love, and war. *J*  
753 *Cell Biol* 175:521–525.
- 754 111. Wang X, Mann CJ, Bai Y, Ni L, Weiner H. 1998. Molecular cloning,  
755 characterization, and potential roles of cytosolic and mitochondrial aldehyde  
756 dehydrogenases in ethanol metabolism in *Saccharomyces cerevisiae*. *J Bacteriol*  
757 180:822–830.
- 758 112. Diker-Cohen T, Koren R, Ravid A. 2006. Programmed cell death of stressed  
759 keratinocytes and its inhibition by vitamin D: The role of death and survival signaling  
760 pathways. *Apoptosis* 11:519–534.

1 **TABLE 1.** Frequency and content of proteins related with autophagy, autolysis and  
2 apoptosis identified in flor yeast cells under biological forming (BFC) and under  
3 fermentative conditions (FC). Frequency of related proteins in *S. cerevisiae* whole  
4 proteome has been included. Protein content at log phase under rich-medium conditions  
5 [29] was included as reference material.

| Process               | <i>S. cerevisiae</i> proteome [33]                          |                             | FC                |                        | BFC               |                        |             |
|-----------------------|-------------------------------------------------------------|-----------------------------|-------------------|------------------------|-------------------|------------------------|-------------|
|                       | Protein frequency                                           | Protein content (mol%) [29] | Protein frequency | Protein content (mol%) | Protein frequency | Protein content (mol%) |             |
| <b>Total Proteins</b> | 6721                                                        |                             | 611               |                        | 413               |                        |             |
| Autophagy             | <b>Total proteins</b>                                       | <b>95 (1.41%)</b>           | <b>0.83</b>       | <b>11 (1.64%)</b>      | <b>1.25</b>       | <b>6 (1.45%)</b>       | <b>0.40</b> |
|                       | Regulation of induction: regulators                         | 26 (0.39%)                  | 0.20              | 4 (0.65%)              | 0.18              | 2 (0.73%)              | 0.17        |
|                       | Regulation of induction: autophagosome-generating machinery | 24 (0.36%)                  | 0.12              | 1 (0.16%)              | 0.09              | 0 (0%)                 | 0           |
|                       | Cargo packaging                                             | 8 (0.12%)                   | 0.32              | 2 (0.33%)              | 0.57              | 2 (0.48%)              | 0.04        |
|                       | Vesicle nucleation                                          | 5 (0.07%)                   | 0.01              | 0 (0%)                 | 0                 | 0 (0%)                 | 0           |
|                       | Vesicle expansion and completion                            | 26 (0.39%)                  | 0.15              | 1 (0.16%)              | 0.32              | 1 (0.24%)              | 0.19        |
|                       | Retrieval                                                   | 7 (0.1%)                    | 0.03              | 1 (0.16%)              | 0.01              | 1 (0.24%)              | 0.01        |
|                       | Docking and fusion                                          | 14 (0.21%)                  | 0.04              | 2 (0.33%)              | 0.07              | 0 (0%)                 | 0           |
|                       | Vesicle breakdown                                           | 1 (0.01%)                   | 0.01              | 0 (0%)                 | 0                 | 0 (0%)                 | 0           |
|                       | Permease efflux                                             | 1 (0.01%)                   | 0                 | 0 (0%)                 | 0                 | 0 (0%)                 | 0           |
| Autolysis             | <b>Total proteins</b>                                       | <b>128 (1.90%)</b>          | <b>1.17</b>       | <b>12 (1.96%)</b>      | <b>1.66</b>       | <b>12 (2.91%)</b>      | <b>4.20</b> |
|                       | Vacuolar proteases                                          | 12 (0.18%)                  | 0.13              | 5 (0.82%)              | 0.63              | 4 (0.97%)              | 1.97        |
|                       | Protease inhibitors                                         | 4 (0.06%)                   | 0.003             | 0 (0%)                 | 0                 | 2 (0.48%)              | 0.32        |
|                       | Glucanases                                                  | 12 (0.18%)                  | 0.19              | 2 (0.33%)              | 0.67              | 2 (0.48%)              | 1.48        |
|                       | Nucleases                                                   | 108 (1.61%)                 | 0.65              | 5 (0.82%)              | 0.36              | 2 (0.48%)              | 0.07        |
|                       | Mannosidases                                                | 8 (0.12%)                   | 0.04              | 0 (0%)                 | 0                 | 1 (0.24%)              | 0.23        |
|                       | Lipases                                                     | 32 (0.48%)                  | 0.16              | 1 (0.16%)              | 0.01              | 1 (0.24%)              | 0.12        |
| Apoptosis             | <b>Total proteins</b>                                       | <b>39 (0.58%)</b>           | <b>2.03</b>       | <b>8 (1.31%)</b>       | <b>1.98</b>       | <b>10 (2.42%)</b>      | <b>2.96</b> |

6

1 **Figure 1**

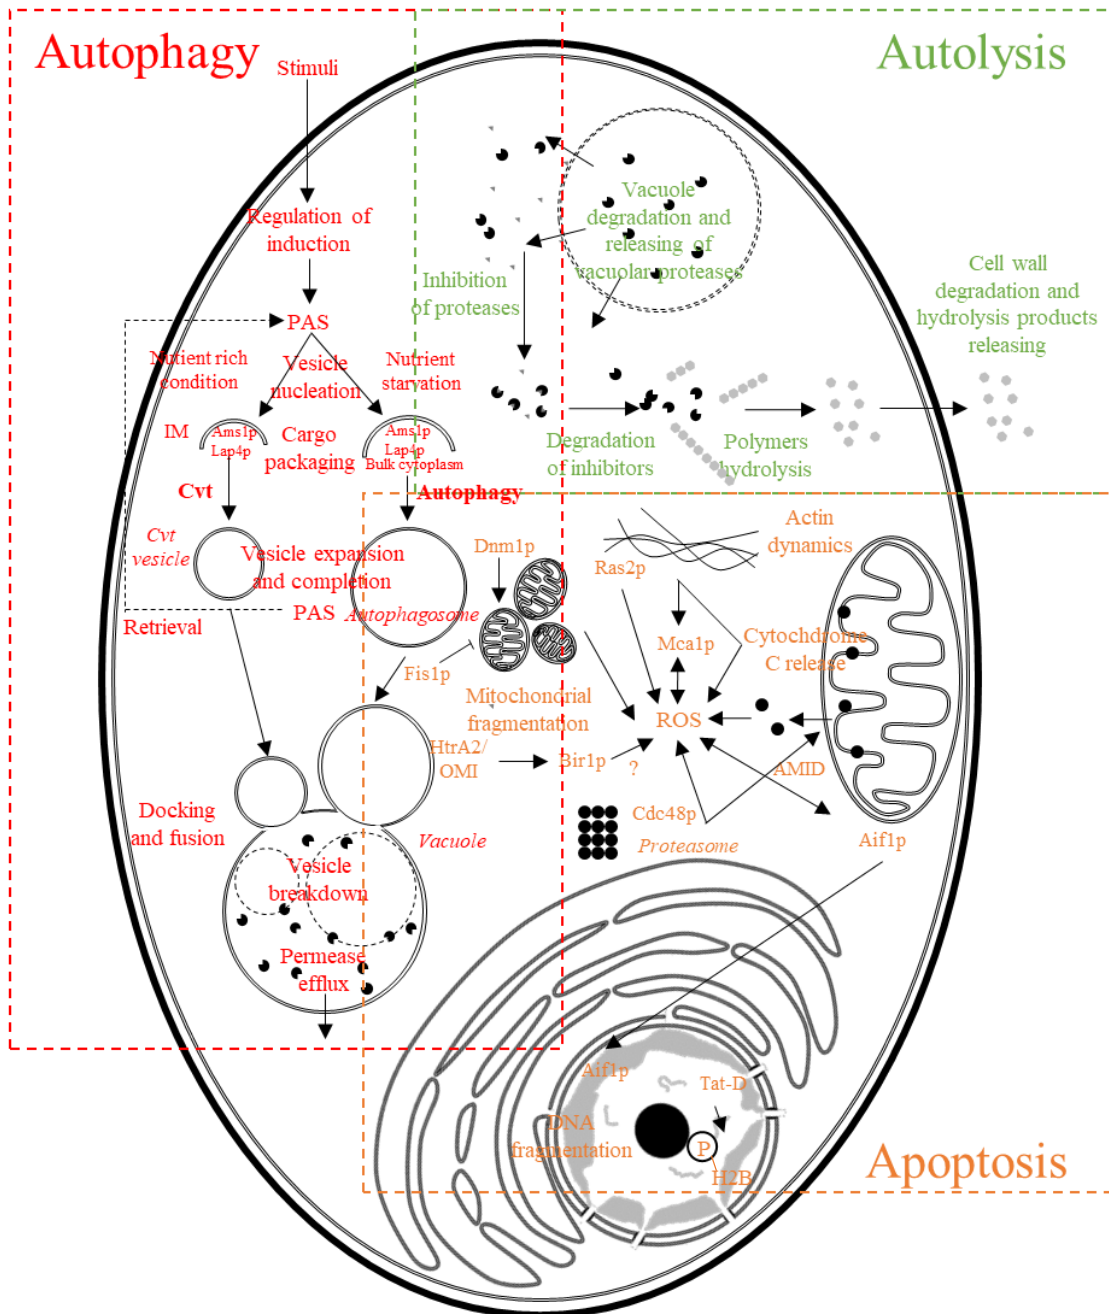

2

3 **FIG 1.** Illustration showing main steps in yeast autophagy, autolysis and apoptosis.

4 PAS: pre-autophagosomal structure/phagophore assembly site; IM: isolation membrane

5 for the formation of the sequestering vesicle; Cvt: cytoplasm to vacuole targeting; ROS:

6 reactive oxygen species; AMID: AIF-homologous mitochondrion-associated inducer of  
7 death.

1 **Figure 2**

2

3

4

5

6

7

8

9

10

11

12

13

14

15

16

17

18

19

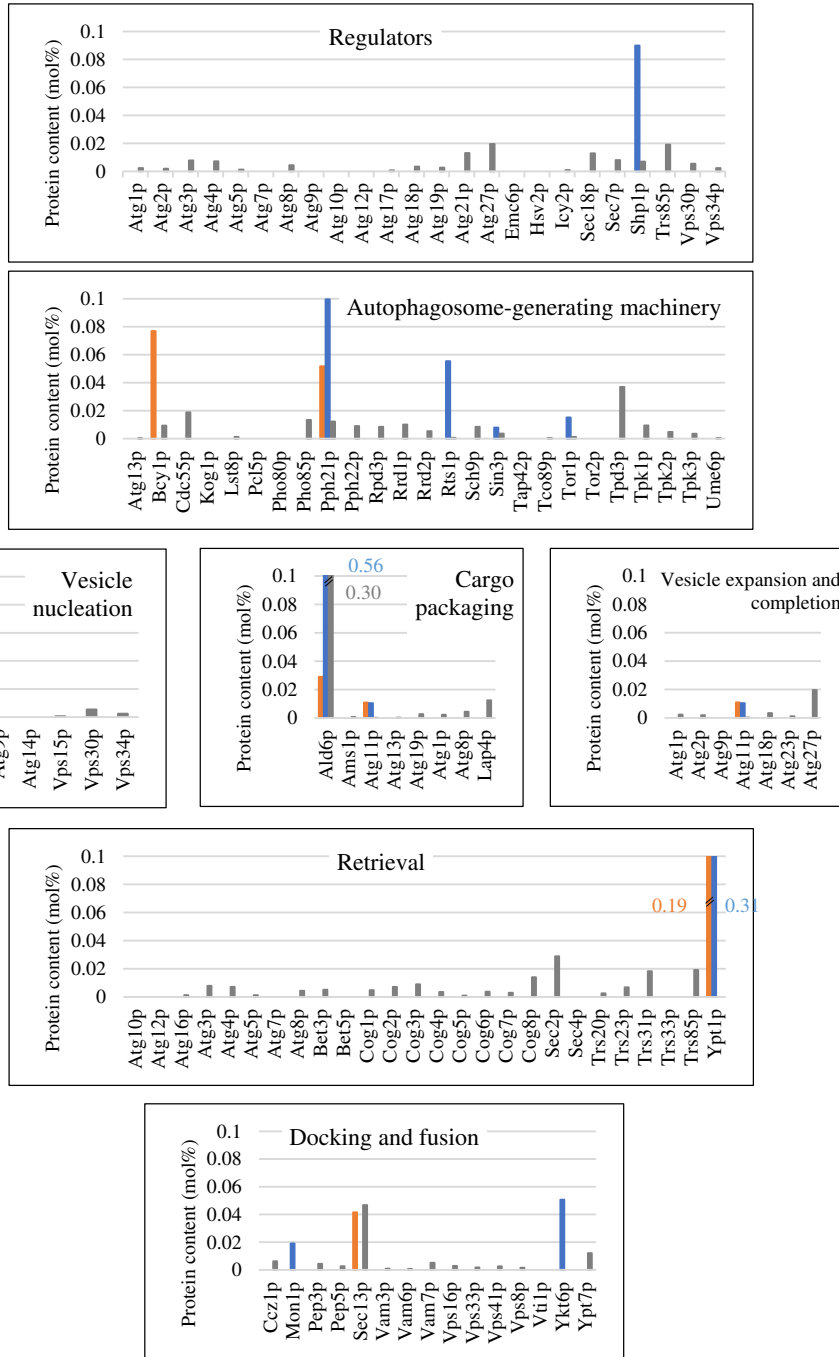

**FIG 2.** Content (mol%) of proteins related to autophagy detected in the flor yeast subjected to biofilm forming (BFC) in orange, fermentative conditions (FC) in blue and under nutrient rich conditions at log phase [29] in grey.

1 **Figure 3**

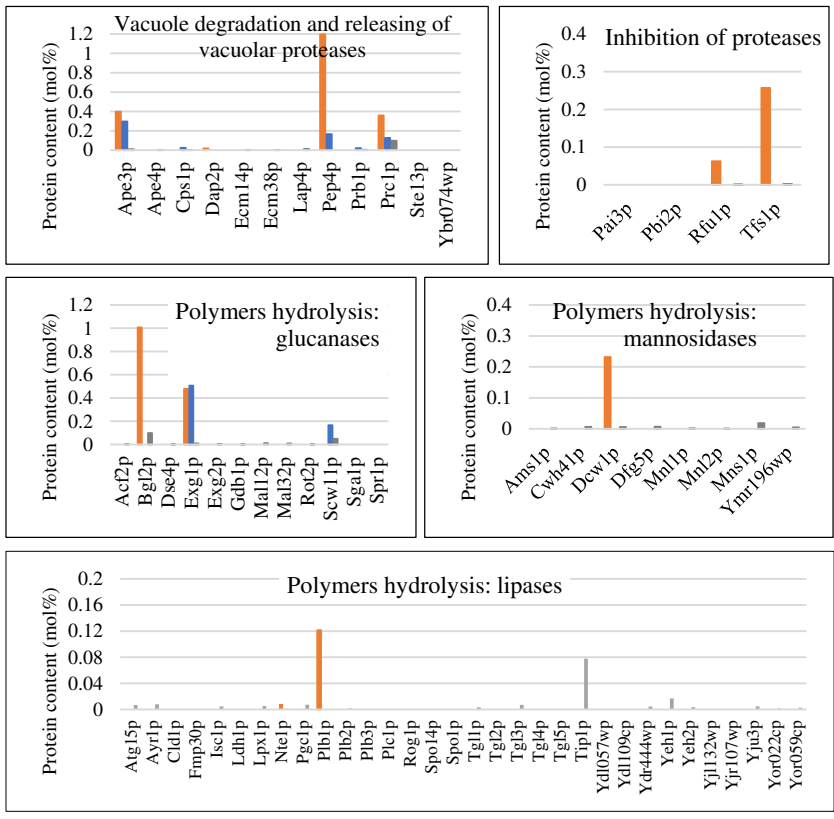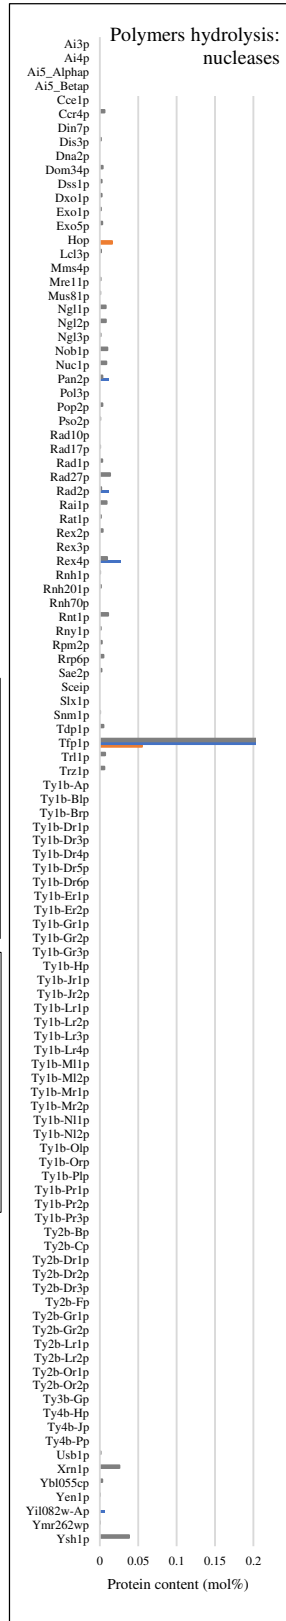

14 **FIG 3.** Content (mol%) of proteins related to autolysis detected in the flor yeast subjected to biofilm forming (BFC) in orange, fermentative conditions (FC) in blue and under nutrient rich conditions at log phase [29] in grey.

1 **Figure 4**

2

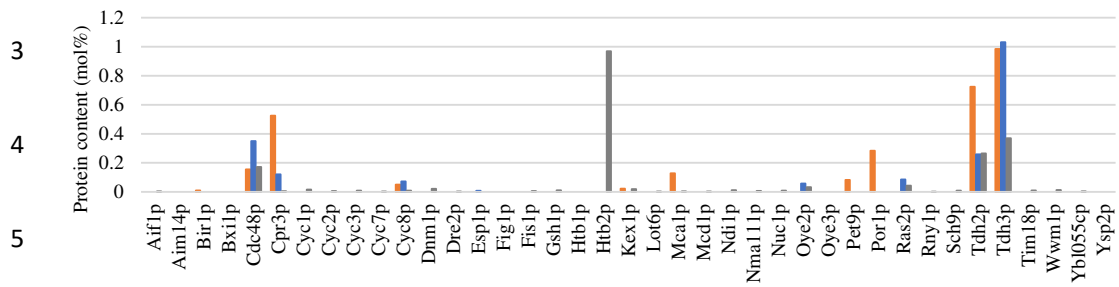

6 **FIG 4.** Content (mol%) of proteins related to apoptosis detected in the flor yeast  
7 subjected to biofilm forming (BFC) in orange, fermentative conditions (FC) in blue and  
8 under nutrient rich conditions at log phase [29] in grey.
